# Supplementary material
Source: publisher figshare collection journal article supplement (https://acs.figshare.com/ndownloader/files/3897541)
Supplement: Supplementary file 1 [file 3897541]

## *Supporting Materials*

# **Role of Metal Contacts in High-Performance Phototransistors Based on WSe<sub>2</sub> Monolayers**

*Wenjing Zhang,<sup>^&£</sup> Ming-Hui Chiu,<sup>%</sup> Chang-Hsiao Chen,<sup>#</sup> Wei Chen,<sup>&\$</sup> Lain-Jong Li,<sup>#%\*</sup> and Andrew Thye Shen Wee<sup>&\*</sup>*

*<sup>^</sup>SZU-NUS Collaborative Innovation Center for Optoelectronic Science & Technology, Shenzhen University, Shenzhen 518060, China.*

*<sup>#</sup>Institute of Atomic and Molecular Sciences, Academia Sinica, Taipei, 11529, Taiwan.*

*<sup>&</sup>Department of Physics, National University of Singapore, 2 Science Drive 3, Singapore 117542.*

*<sup>%</sup>Physical Sciences and Engineering, King Abdullah University of Science and Technology, Thuwal, 23955-6900, Kingdom of Saudi Arabia.*

*<sup>£</sup>Key Laboratory of Optoelectronic Devices and Systems of Ministry of Education and Guangdong Province, Shenzhen University, Shenzhen 518060, China.*

*<sup>\$</sup>Department of Chemistry, National University of Singapore, 3 Science Drive 3, Singapore, 117543.*

Address correspondence to L.J. Li: [lanceli@gate.sinica.edu.tw](mailto:lanceli@gate.sinica.edu.tw)

A. Wee: [phyweets@nus.edu.sg](mailto:phyweets@nus.edu.sg)

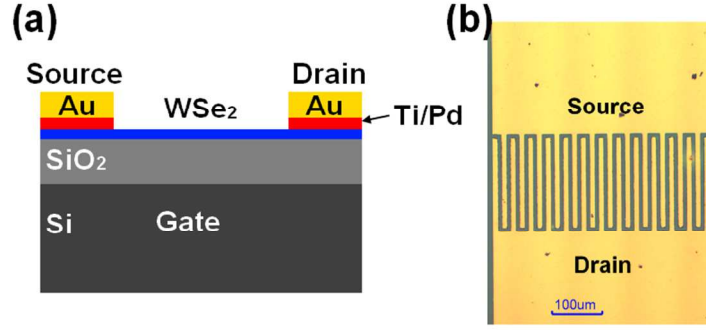

**Figure S1.** (a) Schematic diagram of the phototransistor device structure based on the a CVD WSe<sub>2</sub> monolayer. (b) Top view optical microscopy of the CVD monolayer WSe<sub>2</sub> photodetector. The interdigitated electrodes can substantially increase the metal–WSe<sub>2</sub> contact region, which shall lead to the enhancement in photocarrier generation.

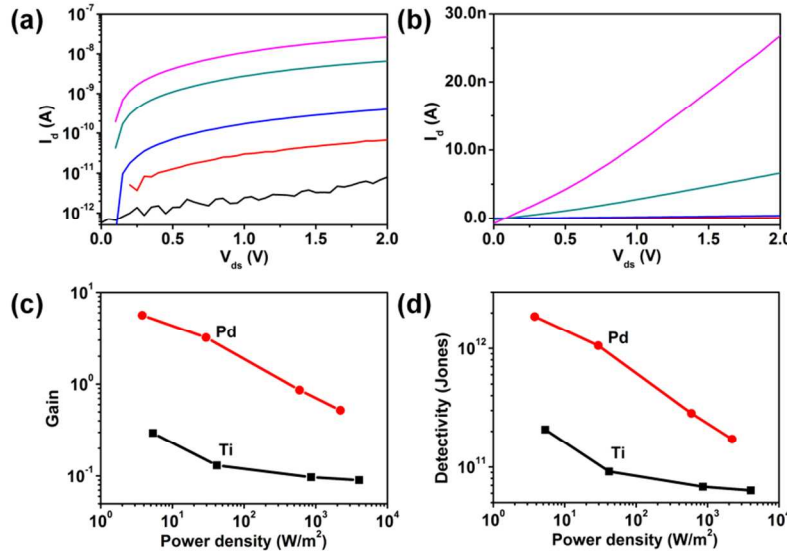

**Figure S2.** Photoresponse of the CVD monolayer WSe<sub>2</sub> phototransistor with Ti metal contacts. (a) and (b)  $I_d$ - $V_{ds}$  characteristics of the phototransistor as a function of light intensity on a logarithmic and linear scale, respectively, at  $V_g=0V$ . From bottom to top, the curves were measured at the following intensities: in dark (black),  $5.3W/m^2$  (red),  $41.9W/m^2$  (blue),  $863.4W/m^2$  (dark cyan) and  $0.4W/cm^2$  (magenta). (c) and (d) The laser power dependence of the photo gain and special detectivity of the phototransistor in ambient air at  $V_{ds}=2V$ .

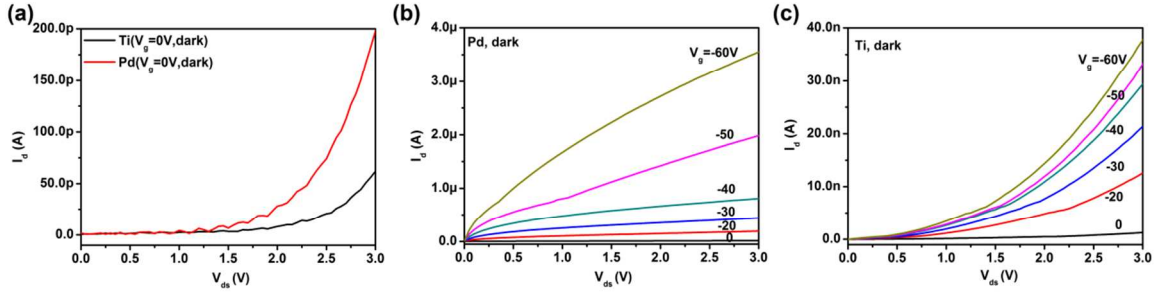

Figure S3. Schottky contacts for the Pd- and Ti-contacted monolayer WSe<sub>2</sub> phototransistors. (a)  $I_d$ - $V_{ds}$  curves at  $V_g=0V$  in dark. (b) and (c) The  $I_d$ - $V_{ds}$  curves for the Pd- and Ti-contacted devices at different negative gate voltages in dark. As shown in Figure S3a,  $I_d$ - $V_{ds}$  curves for the CVD monolayer WSe<sub>2</sub> devices with Pd and Ti contacts are nonlinear, indicating that there are Schottky barriers between electrodes and WSe<sub>2</sub> channels for both metal contacted devices, and the Schottky barrier height of the Ti-contacted device is higher than that of the Pd-contacted device for the smaller threshold drain voltage and higher drain current at the same  $V_{ds}$  and  $V_g$ . As shown in Figures 2a and 4a in the text, the two kinds of devices are in OFF states at  $V_g=0V$  in ambient air. This is reasonable with nonlinear transfer curves and Schottky barriers at  $V_g=0V$ . However, the  $I_d$ - $V_{ds}$  curves of Pd-contacted devices became linear and saturated at higher negative gate voltages (Figure S3b), indicating that the Fermi level has moved to the valence band forming ohmic-like contacts between electrodes and WSe<sub>2</sub> channels. In contrast, the  $I_d$ - $V_{ds}$  curves of Ti-contacted devices remained upward nonlinear (Figure S3c), indicating that the Schottky barrier persisted even at high negative gate voltages.

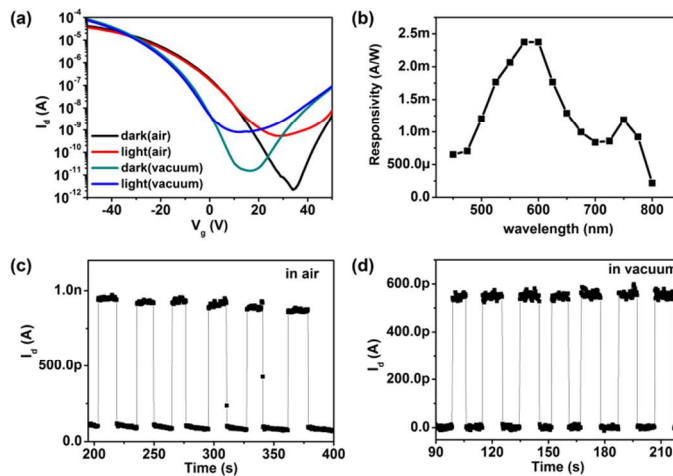

Figure S4. The photoresponse properties of a typical Ti-contacted WSe<sub>2</sub> phototransistor half a year later. (a) The electrical and optical transport properties of the photodetector in high vacuum ( $3.56 \times 10^{-6}$  mbarr) and ambient air at the 650nm laser power density

46.5W/m<sup>2</sup>, V<sub>ds</sub>=2V. (b) In high vacuum, the wavelength dependence of the responsivity for the phototransistor in the OFF state at V<sub>ds</sub>=2V. (c) and (d) The photoswitching behaviors in ambient air and high vacuum, respectively, at the laser power density 46.5W/m<sup>2</sup>, V<sub>ds</sub>=2V, and V<sub>g</sub>=0V. Even half a year later after fabrication of the CVD WSe<sub>2</sub> phototransistors, the mobility of a typical device in high vacuum was ~1.5 cm<sup>2</sup>/Vs, the current ON/OFF ratio was ~10<sup>7</sup>, the transconductance was ~5.4μS, and the subthreshold swing was ~193mV/dec for the bottom gate structure. When exposed the device from high vacuum to ambient air, the performance decayed a little. Compared with the fresh samples(Figure 2 in the text), the electrical properties of the CVD WSe<sub>2</sub> phototransistors were quite stable. From the Figure S4b, we can find that the phototransistor still exhibited good wavelength selectivity. However, the responsivity in the OFF state decreased by about two orders of magnitude(compared with the Figure 6(a) in the text). Impressively, the response speed of the Ti-contacted devices still presented high, which was less than 50ms.
